# Supplementary material for: Measuring Fluorescence as a Means to Evaluate the Physiological Reaction to Growth Retardant Applied to Manage Turf
Source: MDPI journal article supplement (doi:10.3390/agronomy12081776), 2022-07-28
Supplement: s1 [file s1]

## Supplementary data

### Measuring fluorescence as a means to evaluate the physiological reaction to growth retardant applied to manage turf

**Authors:**

**Martyniak D., Prokopiuk K., Żurek G., Rybka K.\***

#### Supplementary tables

**Table S1.** **a.** Results of ANOVA analysis performed on turf quality traits (F-values with statistical significance of the main effect or interaction); **b.** Mean values and homogeneous group identification using Duncan's multiple comparisons of turf ratings.

**Table S2.** **(a.)** ANNOVA analysis and **(b.)** Mean values and homogeneous group identification using Duncan's multiple comparisons of height, biomass and chlorophyll index.

**Table S3.** **(a.)** Mean values and **(b.)** results of homogeneous group identification using Duncan's multiple comparison procedures for Chl a fluorescence parameters: F0, FM, FV, TFM, Area,  $F_v/F_m$ ,  $F_0/F_m$ ,  $RC_{ABS}$ ,  $(1-V_j)/V_j$  and PI.

**Table S4.** **(a.)** Eigenvector values of principal components calculated for a complete dataset and **(b.)** the loading weights of each dataset variable on each principal component

**Figure S1.** The correlation between grass height [cm] and clipped biomass [g/m<sup>2</sup>]. Circles mark varieties of perennial ryegrass (pr), squares- Kentucky bluegrass (Kb), and triangles- tall fescue (tf).

**Table S1. a.** Results of ANOVA analysis performed on turf quality traits (F-values with statistical significance of the main effect or interaction). **b.** Mean values and homogeneous group identification using Duncan's multiple comparisons of turf ratings.

| a                                       |                              |        |        |        |         |        |        |        |        |        |        |        |
|-----------------------------------------|------------------------------|--------|--------|--------|---------|--------|--------|--------|--------|--------|--------|--------|
| Variation<br>factors and<br>interaction | Visual merit                 |        |        |        | Density |        |        |        | Color  |        |        |        |
|                                         | Spring                       |        | Autumn |        | Spring  |        | Autumn |        | Spring |        | Autumn |        |
|                                         | 1 w.                         | 5 w.   | 1 w.   | 5 w.   | 1 w.    | 5 w.   | 1 w.   | 5 w.   | 1 w.   | 5 w.   | 1 w.   | 5 w.   |
| Perennial ryegrass                      |                              |        |        |        |         |        |        |        |        |        |        |        |
| TE (A)                                  | 57.21*                       | 60.15* | 50.23* | 64.74* | 54.28*  | 52.54* | 50.32* | 51.76* | 50.49* | 47.35* | 48.91* | 50.34* |
| Varieties (B)                           | 0.13                         | 0.14   | 0.15   | 0.13   | 0.16    | 0.16   | 0.16   | 0.16   | 0.14   | 0.16   | 0.17   | 0.15   |
| (A) x (B)                               | 0.44                         | 0.26   | 0.32   | 0.45   | 0.54    | 0.64   | 0.48   | 0.27   | 0.34   | 0.27   | 0.38   | 0.45   |
| Kentucky bluegrass                      |                              |        |        |        |         |        |        |        |        |        |        |        |
| TE (A)                                  | 12.47*                       | 11.35* | 11.62* | 14.21* | 15.24*  | 15.16* | 14.88* | 14.92* | 16.34* | 18.41* | 18.16* | 16.24* |
| Varieties (B)                           | 0.75                         | 0.72   | 0.52   | 0.64   | 0.98    | 0.97   | 0.98   | 0.94   | 0.82   | 0.83   | 0.87   | 0.8    |
| (A) x (B)                               | 0.87                         | 0.82   | 0.52   | 0.75   | 0.34    | 0.27   | 0.35   | 0.11   | 1.73   | 0.83   | 0.97   | 0.55   |
| Tall fescue                             |                              |        |        |        |         |        |        |        |        |        |        |        |
| TE (A)                                  | 0.25                         | 0.26   | 0.24   | 0.22   | 0.15    | 0.15   | 0.15   | 0.15   | 0.23   | 0.23   | 0.23   | 0.24   |
| Varieties (B)                           | 0.21                         | 0.2    | 0.21   | 0.19   | 0.15    | 0.15   | 0.15   | 0.15   | 0.21   | 0.23   | 0.22   | 0.22   |
| (A) x (B)                               | 0.18                         | 0.24   | 0.73   | 1.45   | 0.1     | 0.23   | 0.54   | 0.64   | 0.03   | 0.05   | 0.07   | 0.07   |
| b                                       |                              |        |        |        |         |        |        |        |        |        |        |        |
| (A) Treatment applied/<br>(B) Varieties | Visual merit                 |        |        |        | Density |        |        |        | Color  |        |        |        |
|                                         | Spring                       |        | Autumn |        | Spring  |        | Autumn |        | Spring |        | Autumn |        |
|                                         | 1 w.                         | 5 w.   | 1 w.   | 5 w.   | 1 w.    | 5 w.   | 1 w.   | 5 w.   | 1 w.   | 5 w.   | 1 w.   | 5 w.   |
| Perennial ryegrass                      |                              |        |        |        |         |        |        |        |        |        |        |        |
| (A: Treatment)                          | Control                      | 5.2B   | 4.9B   | 5.1B   | 4.6B    | 8.0B   | 7.9B   | 8.0B   | 8.0B   | 6.0B   | 5.7B   | 5.6B   |
|                                         | TE [1.5g/100m <sup>2</sup> ] | 8.5A   | 8.5A   | 8.5A   | 8.6A    | 8.5A   | 8.5A   | 8.4AB  | 8.5A   | 8.3A   | 8.2A   | 8.1A   |
|                                         | TE [4.5g/100m <sup>2</sup> ] | 8.6A   | 8.7A   | 8.6A   | 8.6A    | 8.6A   | 8.7A   | 8.6A   | 8.6A   | 8.4A   | 8.4A   | 8.3A   |
| (B: Varieties)                          | Goalkeeper                   | 7.5A   | 7.4A   | 7.4A   | 7.3A    | 8.4A   | 8.3A   | 8.4A   | 8.3A   | 7.6A   | 7.5A   | 7.4A   |
|                                         | Jackento                     | 7.5A   | 7.3A   | 7.4A   | 7.2A    | 8.3A   | 8.3A   | 8.3A   | 8.3A   | 7.6A   | 7.4A   | 7.3A   |
|                                         | Top Gun                      | 7.4A   | 7.4A   | 7.4A   | 7.3A    | 8.4A   | 8.4A   | 8.4A   | 8.4A   | 7.5A   | 7.4A   | 7.3A   |
| Kentucky bluegrass                      |                              |        |        |        |         |        |        |        |        |        |        |        |
| (A: Treatment)                          | Control                      | 7.7A   | 7.7A   | 7.7A   | 8.2A    | 7.9A   | 7.9A   | 7.9A   | 7.9A   | 7.6A   | 7.5AB  | 7.6A   |
|                                         | TE [1.5g/100m <sup>2</sup> ] | 7.3A   | 7.2A   | 7.2A   | 8.0A    | 8.2A   | 8.1A   | 8.2A   | 8.3A   | 7.9A   | 8.0A   | 8.0A   |
|                                         | TE [4.5g/100m <sup>2</sup> ] | 3.7B   | 3.4B   | 3.6B   | 3.7B    | 6.3B   | 6.3B   | 6.3B   | 6.9A   | 6.6A   | 7.3B   | 6.6B   |
| (B: Varieties)                          | Award                        | 6.3A   | 6.1A   | 6.2A   | 6.7A    | 7.5A   | 7.5A   | 7.5A   | 7.7A   | 7.3A   | 7.5A   | 7.4A   |
|                                         | Bluchip                      | 6.2A   | 6.2A   | 6.2A   | 6.6A    | 7.5A   | 7.5A   | 7.5A   | 7.7A   | 7.4A   | 7.7A   | 7.5A   |
|                                         | Liberator                    | 6.2A   | 6.2A   | 6.2A   | 6.6A    | 7.5A   | 7.4A   | 7.5A   | 7.7A   | 7.3A   | 7.6A   | 7.4A   |
| Tall fescue                             |                              |        |        |        |         |        |        |        |        |        |        |        |
| (A: Treatment)                          | Control                      | 8.6A   | 8.2A   | 8.4A   | 8.1A    | 8.8A   | 8.8A   | 8.8A   | 8.8A   | 9.0A   | 9.0A   | 8.9A   |
|                                         | TE [1.5g/100m <sup>2</sup> ] | 8.8A   | 8.8A   | 8.8A   | 8.8A    | 8.8A   | 8.8A   | 8.8A   | 8.8A   | 8.9A   | 8.9A   | 9.0A   |
|                                         | TE [4.5g/100m <sup>2</sup> ] | 8.7A   | 8.7A   | 8.7A   | 8.6A    | 8.8A   | 8.8A   | 8.8A   | 8.8A   | 8.9A   | 8.8A   | 8.8A   |
| (B: Varieties)                          | Arid 3                       | 8.7A   | 8.6A   | 8.7A   | 8.6A    | 8.8A   | 8.8A   | 8.8A   | 8.8A   | 8.9A   | 8.9A   | 8.8A   |
|                                         | Pixi                         | 8.7A   | 8.6A   | 8.7A   | 8.5A    | 8.8A   | 8.9A   | 8.9A   | 8.9A   | 8.9A   | 8.9A   | 8.8A   |
|                                         | Stowell                      | 8.7A   | 8.6A   | 8.6A   | 8.5A    | 8.8A   | 8.8A   | 8.8A   | 8.8A   | 8.9A   | 9.0A   | 9.0A   |

w. – weeks; \* p<0.05

| a                                     |             |         |           |         |                              |        |           |      |                   |      |        |           |
|---------------------------------------|-------------|---------|-----------|---------|------------------------------|--------|-----------|------|-------------------|------|--------|-----------|
| Variation factors and interaction     | Height [cm] |         |           |         | Biomass [g m <sup>-2</sup> ] |        |           |      |                   |      |        |           |
|                                       | Spring      |         | Autumn    |         | Spring                       |        | Autumn    |      |                   |      |        |           |
|                                       | 1 w.        | 5 w.    | 1 w.      | 5 w.    | 1 w.                         | 5 w.   | 1 w.      | 5 w. |                   |      |        |           |
| Perennial ryegrass                    |             |         |           |         |                              |        |           |      |                   |      |        |           |
| TE (A)                                | 1044.14     | 985.53* | 627.73*   | 876.63* | 1044.72**                    | 995.73 | 2766.01** |      |                   |      |        | 984.74*   |
| Varieties                             | 140.64*     | 106.32* | 1.01      | 2.32    | 147.93*                      | 101.84 | 41.81*    |      |                   |      |        | 3.44      |
| (A) x (B)                             | 4.22*       | 4.50*   | 13.15*    | 2.72    | 4.05*                        | 3.85*  | 14.79*    |      |                   |      |        | 3.75      |
| Kentucky bluegrass                    |             |         |           |         |                              |        |           |      |                   |      |        |           |
| TE (A)                                | 2366.05     | 986.82* | 873.09*   | 785.02* | 3166.76**                    | 954.82 | 67.83*    |      |                   |      |        | 1828.52** |
| Varieties                             | 13.01*      | 6.32*   | 8.42*     | 0.54    | 14.52*                       | 860.04 | 0.65      |      |                   |      |        | 5.56      |
| (A) x (B)                             | 0.69        | 1.72    | 0.53      | 0.88    | 0.76                         | 1.84   | 0.53      |      |                   |      |        | 0.87      |
| Tall fescue                           |             |         |           |         |                              |        |           |      |                   |      |        |           |
| TE (A)                                | 1008.76     | 21.85*  | 1098.76** | 120.43* | 1073.92**                    | 121.32 | 56.81*    |      |                   |      |        | 212.13*   |
| Varieties                             | 16.90*      | 2.5     | 987.09*   | 12.52*  | 34.52*                       | 1.32   | 344.09*   |      |                   |      |        | 15.02*    |
| (A) x (B)                             | 29.8*       | 5.1*    | 10.3*     | 33.8*   | 31.8*                        | 5.8*   | 15.3*     |      |                   |      |        | 34.0*     |
| b                                     |             |         |           |         |                              |        |           |      |                   |      |        |           |
| (A) Treatmentt applied/ (B) Varieties | Height [cm] |         |           |         | Biomass [g/m <sup>2</sup> ]  |        |           |      | Chl Index [0-999] |      |        |           |
|                                       | Spring      |         | Autumn    |         | Spring                       |        | Autumn    |      | Sprin g           |      | Autumn |           |
|                                       | 1 w.        | 5 w.    | 1 w.      | 5 w.    | 1 w.                         | 5 w.   | 1 w.      | 5 w. | 1 w.              | 5 w. | 1 w.   | 5 w.      |
| Perennial ryegrass                    |             |         |           |         |                              |        |           |      |                   |      |        |           |
| (A: Treatment)                        | 11.7        |         | 11.1      |         | 63.8                         | 11.9   | 35.7      | 29.5 | 381               |      | 286    |           |
| Control                               | A           | 6.5A    | A         | 9.4A    | A                            | B      | A         | A    | A                 | 131C | A      | 359B      |
| TE [1.5g/100m <sup>2</sup> ]          | 8.0B        | 7.3A    | 8.4B      | 8.7B    | B                            | C      | B         | B    | 317B              | 285B | A      | 364B      |
| TE [4.5g/100m <sup>2</sup> ]          | 4.4C        | 7.0A    | 6.9C      | 7.2C    | C                            | A      | C         | C    | C                 | 333A | 221B   | A         |
| (B: Varieties)                        |             |         |           |         | 37.2                         | 12.4   | 24.2      | 27.4 | 330               |      | 271    | 496       |
| Goalkeeper                            | 7.9B        | 6.4B    | 8.3A      | 8.7A    | A                            | A      | A         | A    | A                 | 254A | A      | A         |
| Jackento                              | 8.1A        | 7.5A    | 8.8A      | 8.4A    | A                            | A      | A         | A    | A                 | 248A | 254B   | A         |
| Top Gun                               | 8.5A        | 6.8B    | 9.2A      | 8.2A    | A                            | A      | A         | A    | A                 | 247A | 254B   | A         |
| Kentucky bluegrass                    |             |         |           |         |                              |        |           |      |                   |      |        |           |
| (A: Treatment)                        |             |         |           |         | 40.1                         |        | 17.8      | 26.5 | 408               |      | 394    |           |
| Control                               | 9.9A        | 6.2B    | 5.7A      | 8.7A    | C                            | 9.6A   | A         | A    | A                 | 196B | B      | 264A      |
| TE [1.5g/100m <sup>2</sup> ]          | 4.2B        | 7.1A    | 4.1B      | 4.4B    | B                            | A      | 12.7B     | B    | 340B              | 430A | A      | 235B      |
| TE [4.5g/100m <sup>2</sup> ]          | 3.8C        | 6.4B    | 3.5C      | 3.7C    | A                            | 8.0B   | 10.5C     | 7.3C | C                 | 232B | A      | 174C      |
| (B: Varieties)                        |             |         |           |         | 21.4                         |        | 14.6      | 15.9 | 368               |      | 379    |           |
| Award                                 | 5.1B        | 6.4B    | 4.7A      | 5.8A    | A                            | 9.2A   | A         | A    | A                 | 275B | A      | 229A      |
| Bluchip                               | 6.1A        | 6.2B    | 4.3B      | 5.5A    | A                            | 9.2A   | A         | A    | A                 | 268B | A      | 224A      |
| Liberator                             | 6.2A        | 7.1A    | 4.2B      | 5.5A    | A                            | A      | A         | A    | A                 | 315A | A      | 220A      |
| Tall fescue                           |             |         |           |         |                              |        |           |      |                   |      |        |           |

|                              |      |      |      |      |      |      |       |      |      |     |     |      |
|------------------------------|------|------|------|------|------|------|-------|------|------|-----|-----|------|
| (A: Treatment)               | 13.6 |      |      |      | 57.3 | 10.7 | 10.7  | 36.9 | 363  | 232 | 394 |      |
| Control                      | A    | 5.4B | 3.5A | 8.5A | A    | C    | A     | A    | A    | C   | A   | 262A |
| TE [1.5g/100m <sup>2</sup> ] |      |      |      |      | 27.0 | 14.2 | 10.0  | 14.4 |      | 456 | 408 |      |
|                              | 6.9B | 5.3B | 3.3A | 4.6B | B    | B    | A     | B    | 302B | A   | A   | 219B |
| TE [4.5g/100m <sup>2</sup> ] |      |      |      |      | 26.5 | 18.0 | 10.9  | 15.8 |      | 302 | 344 |      |
|                              | 7.4B | 6.3A | 3.6A | 4.2B | B    | A    | A     | B    | 319B | B   | B   | 203C |
| (B: Varieties)               |      |      |      |      | 37.1 | 14.4 |       | 22.0 |      | 307 | 392 |      |
| Arid 3                       | 9.0A | 5.7A | 3.2B | 5.6B | B    | A    | 9.7C  | B    | 320B | A   | A   | 224A |
|                              |      |      |      |      | 33.5 | 14.4 | 11.7  | 23.3 |      | 346 | 355 |      |
| Pixi                         | 8.2B | 5.7A | 3.8A | 6.0A | C    | A    | A     | A    | 326B | A   | A   | 230A |
|                              |      |      |      | 5.8A | 40.5 | 14.0 |       | 21.9 | 339  | 345 | 398 |      |
| Stowell                      | 9.8A | 5.5A | 3.3B | B    | A    | A    | 10.2B | B    | A    | A   | A   | 229A |

w. – weeks; \* p<0.05; \*\* p<0.001

**Table S3. a.** Results of ANOVA analysis performed on chlorophyll index and Chl *a* fluorescence traits (F-values with statistical significance of the main effect or interactions). **b.** Mean values and results of homogeneous group identification using Duncan's multiple comparison of Chl *a* fluorescence parameters.

| a                                 |                                    |         |         |         |                                |         |        |         |                |        |        |         |
|-----------------------------------|------------------------------------|---------|---------|---------|--------------------------------|---------|--------|---------|----------------|--------|--------|---------|
| Variation factors and interaction | Ch Index [0-999]                   |         |         |         | F <sub>0</sub>                 |         |        |         | F <sub>M</sub> |        |        |         |
|                                   | Spring                             |         | Autumn  |         | Spring                         |         | Autumn |         | Spring         |        | Autumn |         |
|                                   | 1 w.                               | 5 w.    | 1 w.    | 5 w.    | 1 w.                           | 5 w.    | 1 w.   | 5 w.    | 1 w.           | 5 w.   | 1 w.   | 5 w.    |
| Perennial ryegrass                |                                    |         |         |         |                                |         |        |         |                |        |        |         |
| TE (A)                            | 81.72*                             | 171.21* | 99.56*  | 33.35*  | 31.05*                         | 42.27*  | 2.62*  | 0.90    | 23.09*         | 63.43* | 8.63*  | 6.18    |
| Varieties (B)                     | 0.25                               | 0.89    | 67.12*  | 3.70    | 1.12                           | 3.75    | 0.07   | 1.00    | 7.46*          | 23.09* | 3.12   | 15.72   |
| (A) x (B)                         | 1.26                               | 1.10    | 1.03    | 0.93    | 2.60*                          | 8.53*   | 1.23   | 5.46*   | 2.76*          | 5.92*  | 0.38   | 1.08    |
| Kentucky bluegrass                |                                    |         |         |         |                                |         |        |         |                |        |        |         |
| TE (A)                            | 206.62*                            | 128.55* | 15.74*  | 117.73* | 47.02*                         | 2.21    | 6.91   | 122.10* | 4.11           | 10.10* | 1.25   | 52.01*  |
| Varieties (B)                     | 12.35*                             | 20.11*  | 0.75    | 3.31    | 0.56                           | 6.92    | 0.64   | 14.83*  | 1.61           | 2.95   | 1.01   | 6.21*   |
| (A) x (B)                         | 3.14*                              | 1.85    | 0.59    | 0.46    | 0.34                           | 2.36    | 13.13* | 3.75*   | 0.12           | 3.49*  | 16.74* | 2.89*   |
| Tall fescue                       |                                    |         |         |         |                                |         |        |         |                |        |        |         |
| TE (A)                            | 28.88*                             | 229.10* | 6.90*   | 520.72* | 1.10                           | 2.26    | 0.27   | 11.34*  | 6.29           | 5.99   | 0.46   | 3.84    |
| Varieties (B)                     | 1.05                               | 4.52    | 1.69    | 0.99    | 0.41                           | 1.45    | 1.05   | 5.10    | 1.12           | 1.24   | 1.44   | 2.03    |
| (A) x (B)                         | 22.06*                             | 1.52    | 54.42*  | 60.62*  | 6.43*                          | 9.68*   | 7.01*  | 3.06*   | 3.24*          | 6.12*  | 5.63*  | 3.23*   |
| Variation factors and interaction | F <sub>v</sub>                     |         |         |         | T <sub>FM</sub>                |         |        |         | Area           |        |        |         |
|                                   | Spring                             |         | Autumn  |         | Spring                         |         | Autumn |         | Spring         |        | Autumn |         |
|                                   | 1 w.                               | 5 w.    | 1 w.    | 5 w.    | 1 w.                           | 5 w.    | 1 w.   | 5 w.    | 1 w.           | 5 w.   | 1 w.   | 5 w.    |
| Perennial ryegrass                |                                    |         |         |         |                                |         |        |         |                |        |        |         |
| TE (A)                            | 30.08*                             | 63.51*  | 10.29*  | 12.68*  | 66.65*                         | 5.99    | 11.64* | 24.12*  | 190.83*        | 17.68* | 0.48   | 7.64*   |
| Varieties (B)                     | 9.62*                              | 10.17*  | 8.67*   | 31.75*  | 17.2*                          | 0.12    | 6.04   | 3.19    | 0.81           | 4.38   | 0.16   | 1.53    |
| (A) x (B)                         | 2.51                               | 3.45*   | 0.83    | 0.44    | 2.39                           | 4.03    | 1.03   | 7.49    | 2.57           | 8.34*  | 0.73   | 7.19*   |
| Kentucky bluegrass                |                                    |         |         |         |                                |         |        |         |                |        |        |         |
| TE (A)                            | 4.37                               | 7.99*   | 1.26    | 37.73*  | 256.51*                        | 0.82    | 1.29   | 82.67*  | 109.84*        | 15.97* | 2.00   | 20.35*  |
| Varieties (B)                     | 1.89                               | 4.86    | 2.91    | 5.07*   | 1.00                           | 162.70* | 0.08   | 1.00    | 2.98           | 4.79   | 1.42   | 6.33    |
| (A) x (B)                         | 0.09                               | 5.62*   | 16.63*  | 2.44    | 7.26                           | 2.46    | 11.44* | 1.92    | 1.05           | 0.49   | 30.46* | 1.53    |
| Tall fescue                       |                                    |         |         |         |                                |         |        |         |                |        |        |         |
| TE (A)                            | 9.74*                              | 1.44    | 0.52    | 4.05    | 7.40*                          | 1.27    | 10.80* | 12.40*  | 4.52           | 0.17   | 1.52   | 2.08    |
| Varieties (B)                     | 1.51                               | 1.70    | 1.64    | 1.43    | 1.05                           | 1.03    | 0.92   | 17.04*  | 0.93           | 0.57   | 1.07   | 0.43    |
| (A) x (B)                         | 38.7*                              | 6.24*   | 5.37*   | 3.10*   | 10.83*                         | 6.45*   | 4.91*  | 5.04*   | 25.9*          | 15.7*  | 0.59   | 3.28*   |
| Variation factors and interaction | F <sub>v</sub> /F <sub>M</sub>     |         |         |         | F <sub>0</sub> /F <sub>M</sub> |         |        |         | RC/ABS         |        |        |         |
|                                   | Spring                             |         | Autumn  |         | Spring                         |         | Autumn |         | Spring         |        | Autumn |         |
|                                   | 1 w.                               | 5 w.    | 1 w.    | 5 w.    | 1 w.                           | 5 w.    | 1 w.   | 5 w.    | 1 w.           | 5 w.   | 1 w.   | 5 w.    |
| Perennial ryegrass                |                                    |         |         |         |                                |         |        |         |                |        |        |         |
| TE (A)                            | 51.84*                             | 9.08*   | 5.95*   | 309.91* | 51.94*                         | 26.07*  | 8.54*  | 312.52* | 68.43*         | 20.28* | 29.48* | 64.12*  |
| Varieties (B)                     | 1.46                               | 2.20    | 36.13*  | 4.48    | 1.46                           | 2.51    | 1.00   | 3.17    | 0.45           | 1.02   | 1.49   | 6.68    |
| (A) x (B)                         | 0.40                               | 1.20    | 5.56*   | 4.43*   | 0.13                           | 2.30    | 4.70*  | 3.48*   | 2.99*          | 1.76   | 2.23   | 11.07*  |
| Kentucky bluegrass                |                                    |         |         |         |                                |         |        |         |                |        |        |         |
| TE (A)                            | 43.43*                             | 3.83    | 12.19*  | 2.09    | 42.74*                         | 4.74    | 20.16* | 2.55    | 180.08*        | 59.87* | 6.82   | 305.46* |
| Varieties (B)                     | 1.00                               | 33.30*  | 9.26*   | 1.00    | 2.84                           | 23.60*  | 1.00   | 6.86    | 0.06           | 8.07*  | 1.00   | 19.66*  |
| (A) x (B)                         | 0.25                               | 7.29*   | 6.19*   | 0.91    | 0.34                           | 7.54*   | 5.12*  | 0.91    | 3.54*          | 3.76*  | 3.99*  | 1.90    |
| Tall fescue                       |                                    |         |         |         |                                |         |        |         |                |        |        |         |
| TE (A)                            | 39.15*                             | 0.32    | 1.13    | 19.02*  | 36.14*                         | 0.49    | 1.15   | 14.36*  | 9.57*          | 0.48   | 2.81   | 19.18*  |
| Varieties (B)                     | 0.08                               | 5.17    | 75.85*  | 0.02    | 0.11                           | 6.92    | 79.57* | 0.59    | 14.15*         | 1.15   | 14.01* | 65.06*  |
| (A) x (B)                         | 1.92                               | 9.37*   | 8.78*   | 2.36    | 3.36*                          | 9.94*   | 9.11*  | 2.21    | 6.3*           | 2.87*  | 2.65*  | 4.75*   |
| Variation factors and interaction | (1-V <sub>J</sub> )/V <sub>J</sub> |         |         |         | PI <sub>ABS</sub>              |         |        |         |                |        |        |         |
|                                   | Spring                             |         | Autumn  |         | Spring                         |         | Autumn |         | Spring         |        | Autumn |         |
|                                   | 1 w.                               | 5 w.    | 1 w.    | 5 w.    | 1 w.                           | 5 w.    | 1 w.   | 5 w.    | 1 w.           | 5 w.   | 1 w.   | 5 w.    |
| Perennial ryegrass                |                                    |         |         |         |                                |         |        |         |                |        |        |         |
| TE (A)                            | 35.40*                             | 3.45    | 122.73* | 22.29*  | 84.24*                         | 25.93*  | 23.45* |         | 84.27*         |        |        |         |
| Varieties (B)                     | 0.59                               | 26.33*  | 1.71    | 5.42    | 0.73                           | 2.5     | 3.54   |         | 40.81*         |        |        |         |

|                    |         |        |        |        |         |        |        |         |
|--------------------|---------|--------|--------|--------|---------|--------|--------|---------|
| (A) x (B)          | 1.74    | 1.53   | 2.00   | 1.71   | 1.63    | 1.66   | 2.94*  | 1.08    |
| Kentucky bluegrass |         |        |        |        |         |        |        |         |
| TE (A)             | 160.21* | 14.79* | 35.37* | 18.78* | 196.68* | 27.16* | 1.87   | 64.19*  |
| Varieties (B)      | 9.94*   | 10.73* | 2.24   | 10.68* | 0.66    | 8.00*  | 24.83* | 11.84*  |
| (A) x (B)          | 5.76*   | 0.42   | 6.47*  | 3.20*  | 2.55*   | 4.07*  | 5.34*  | 1.79    |
| Tall fescue        |         |        |        |        |         |        |        |         |
| TE (A)             | 0.53    | 0.03   | 18.31* | 31.69* | 12.35*  | 0.38   | 2.12   | 10.42*  |
| Varieties (B)      | 0.91    | 0.03   | 2.51   | 10.46* | 8.06*   | 1.02   | 18.47* | 110.68* |
| (A) x (B)          | 8.76*   | 4.15*  | 5.27*  | 4.22*  | 4.61*   | 3.23*  | 2.57*  | 5.03*   |

| b                  |                 |                 |                 |                 |                 |                 |                 |                 |                 |                 |                 |                 |
|--------------------|-----------------|-----------------|-----------------|-----------------|-----------------|-----------------|-----------------|-----------------|-----------------|-----------------|-----------------|-----------------|
| F <sub>0</sub>     |                 |                 |                 | F <sub>M</sub>  |                 |                 |                 | F <sub>V</sub>  |                 |                 |                 |                 |
| weeks:             | Spring          |                 | Autumn          |                 | Spring          |                 | Autumn          |                 | Spring          |                 | Autumn          |                 |
|                    | 1 <sup>st</sup> | 5 <sup>th</sup> |
| Perennial ryegrass |                 |                 |                 |                 |                 |                 |                 |                 |                 |                 |                 |                 |
| (A: Treatment)     |                 |                 |                 |                 |                 |                 |                 |                 |                 |                 |                 |                 |
| Control            | 6490A           | 5215C           | 6641A           | 6331A           | 28706B          | 14133C          | 25998B          | 24081A          | 22216C          | 8918C           | 19357B          | 17749B          |
| TE [1.5g/100m²]    | 5861B           | 6037B           | 5819AB          | 6440A           | 31090A          | 17374B          | 29295A          | 26117A          | 25230B          | 11336B          | 23475A          | 19677B          |
| TE [4.5g/100m²]    | 5162C           | 6475A           | 5717B           | 5993A           | 26938C          | 19524A          | 24591B          | 28767A          | 21775A          | 13049A          | 18874B          | 22774A          |
| (B: Varieties)     |                 |                 |                 |                 |                 |                 |                 |                 |                 |                 |                 |                 |
| Goalkeeper         | 5793A           | 5960A           | 6130A           | 6055A           | 28827AB         | 17772A          | 27460AB         | 24286A          | 23034AB         | 11812A          | 21330A          | 18230B          |
| Jackento           | 5989A           | 5627A           | 6129A           | 6671A           | 30116A          | 15464B          | 24307B          | 28456A          | 24127A          | 9837A           | 18177B          | 21784A          |
| Top Gun            | 5732A           | 6140A           | 5917A           | 6038A           | 27792B          | 17795A          | 28117A          | 26225A          | 22060B          | 11655A          | 22199A          | 20187AB         |
| Kentucky bluegrass |                 |                 |                 |                 |                 |                 |                 |                 |                 |                 |                 |                 |
| (A: Treatment)     |                 |                 |                 |                 |                 |                 |                 |                 |                 |                 |                 |                 |
| Control            | 6364A           | 6170A           | 4668A           | 5403B           | 26233A          | 19338B          | 21281A          | 24631A          | 19869A          | 13167A          | 16612A          | 19227A          |
| TE [1.5g/100m²]    | 5317B           | 6503A           | 4932AB          | 5666A           | 27790A          | 22574A          | 23050A          | 25541A          | 22472A          | 16071B          | 18118A          | 19875A          |
| TE [4.5g/100m²]    | 4713C           | 6248A           | 5373B           | 4772C           | 24114A          | 20159B          | 22492A          | 20326B          | 19400A          | 13910A          | 17119A          | 15553B          |
| (B: Varieties)     |                 |                 |                 |                 |                 |                 |                 |                 |                 |                 |                 |                 |
| Award              | 5639A           | 6422A           | 5057A           | 4717B           | 27683A          | 21450A          | 23352A          | 21196B          | 22044A          | 15028A          | 18295A          | 16479B          |
| Bluchip            | 5296A           | 6027A           | 4798A           | 5228B           | 25237A          | 20587A          | 20521A          | 24089A          | 19940A          | 14559A          | 15722A          | 18861A          |
| Liberator          | 5459A           | 6472A           | 5117A           | 5896A           | 25217A          | 20034A          | 22950A          | 25212A          | 19758A          | 13561A          | 17833A          | 19316A          |
| Tall fescue        |                 |                 |                 |                 |                 |                 |                 |                 |                 |                 |                 |                 |
| (A: Treatment)     |                 |                 |                 |                 |                 |                 |                 |                 |                 |                 |                 |                 |
| Control            | 5668A           | 6899A           | 4879A           | 5353A           | 24609B          | 22092A          | 19910A          | 26367A          | 18941B          | 15193A          | 15030A          | 21013A          |
| TE [1.5g/100m²]    | 5728A           | 6204A           | 5233A           | 4076B           | 30493A          | 22443A          | 21813A          | 19700A          | 24764A          | 16238A          | 16579A          | 15623A          |
| TE [4.5g/100m²]    | 5220A           | 5366A           | 5546A           | 5880A           | 28486AB         | 18949A          | 24433A          | 21791A          | 23266A          | 13583A          | 18886A          | 16111A          |
| (B: Varieties)     |                 |                 |                 |                 |                 |                 |                 |                 |                 |                 |                 |                 |
| Arid 3             | 5425A           | 6413A           | 5096A           | 4496A           | 27637A          | 19336A          | 20295A          | 20825A          | 22211A          | 12923A          | 15199A          | 16329A          |
| Pixi               | 5806A           | 6459A           | 4634A           | 5151A           | 29179A          | 20890A          | 21653A          | 23076A          | 23372A          | 16798A          | 17019A          | 17924A          |
| Stowell            | 5385A           | 5597A           | 5928A           | 5463A           | 26772A          | 23258A          | 24207A          | 23958A          | 21387A          | 15295A          | 18278A          | 18494A          |

| T <sub>FM</sub>    |                 |                 |                 | Area            |                 |                 |                 | F <sub>V</sub> /F <sub>M</sub> |                 |                 |                 |                 |
|--------------------|-----------------|-----------------|-----------------|-----------------|-----------------|-----------------|-----------------|--------------------------------|-----------------|-----------------|-----------------|-----------------|
| weeks:             | Spring          |                 | Autumn          |                 | Spring          |                 | Autumn          |                                | Spring          |                 | Autumn          |                 |
|                    | 1 <sup>st</sup> | 5 <sup>th</sup>                | 1 <sup>st</sup> | 5 <sup>th</sup> | 1 <sup>st</sup> | 5 <sup>th</sup> |
| Perennial ryegrass |                 |                 |                 |                 |                 |                 |                 |                                |                 |                 |                 |                 |
| (A: Treatment)     |                 |                 |                 |                 |                 |                 |                 |                                |                 |                 |                 |                 |
| Control            | 310C            | 266A            | 427AB           | 848A            | 613066C         | 423721B         | 698206A         | 890529B                        | 0.774B          | 0.631B          | 0.741B          | 0.733C          |
| TE [1.5g/100m²]    | 661A            | 281A            | 497A            | 634B            | 940722A         | 536102A         | 774622A         | 857076B                        | 0.811A          | 0.645AB         | 0.800A          | 0.747B          |
| TE [4.5g/100m²]    | 566B            | 282A            | 353B            | 854A            | 814854B         | 555806A         | 741965A         | 1044414A                       | 0.806A          | 0.663A          | 0.762AB         | 0.792A          |
| (B: Varieties)     |                 |                 |                 |                 |                 |                 |                 |                                |                 |                 |                 |                 |
| Goalkeeper         | 508AB           | 276A            | 421AB           | 826A            | 775829A         | 508809A<br>B    | 742267A         | 887054A                        | 0.798A          | 0.659A          | 0.770B          | 0.746A          |
| Jackento           | 493B            | 278A            | 470A            | 716A            | 792146A         | 455328B         | 750948A         | 973229A                        | 0.800A          | 0.626A          | 0.747C          | 0.765A          |
| Top Gun            | 535A            | 276A            | 385B            | 794A            | 800669A         | 551493A         | 721579A         | 931734A                        | 0.792A          | 0.655A          | 0.787A          | 0.762A          |
| Kentucky bluegrass |                 |                 |                 |                 |                 |                 |                 |                                |                 |                 |                 |                 |
| (A: Treatment)     |                 |                 |                 |                 |                 |                 |                 |                                |                 |                 |                 |                 |
| Control            | 287C            | 271A            | 630A            | 461A            | 644553C         | 490679B         | 654115A         | 796769A                        | 0.753B          | 0.669A          | 0.778A          | 0.774A          |
| TE [1.5g/100m²]    | 424B            | 285A            | 694A            | 296B            | 812376A         | 648884A         | 789306A         | 660855B                        | 0.807A          | 0.706A          | 0.784A          | 0.777A          |

|                                         |      |      |      |      |         |         |         |         |        |        |        |        |
|-----------------------------------------|------|------|------|------|---------|---------|---------|---------|--------|--------|--------|--------|
| TE<br>[4.5g/100m²]<br>(B:<br>Varieties) | 533A | 273A | 694A | 289B | 698695B | 553039B | 738579A | 556870B | 0.803A | 0.683A | 0.750B | 0.762A |
| Award                                   | 391A | 273B | 676A | 326A | 758978A | 569523A | 736500A | 548046B | 0.793A | 0.692A | 0.782A | 0.772A |
| Bluchip                                 | 466A | 294A | 673A | 344A | 702682A | 579908A | 667048A | 731299A | 0.787A | 0.701A | 0.756B | 0.782A |
| Liberator                               | 386A | 262A | 669A | 375A | 693964A | 543171A | 778509A | 735149A | 0.783A | 0.665A | 0.774A | 0.759A |

Tall fescue

| (A:<br>Treatment) |                    |      |      |       |      |          |         |          |         |        |        |        |        |
|-------------------|--------------------|------|------|-------|------|----------|---------|----------|---------|--------|--------|--------|--------|
| TE                | Control            | 313B | 25A  | 700AB | 582A | 635993A  | 550757A | 680102A  | 807914A | 0.770B | 0.684A | 0.747A | 0.792A |
|                   | [1.5g/100m²]       | 544A | 263A | 500B  | 465B | 879294A  | 558463A | 729413A  | 653208A | 0.811A | 0.717A | 0.758A | 0.790A |
|                   | TE<br>[4.5g/100m²] | 494A | 347A | 833A  | 407B | 1004243A | 602551A | 1012018A | 751843A | 0.816A | 0.712A | 0.767A | 0.739B |
| (B:<br>Varieties) |                    |      |      |       |      |          |         |          |         |        |        |        |        |
|                   | Arid 3             | 485A | 266A | 583A  | 592A | 861290A  | 555635A | 690584B  | 733929A | 0.800A | 0.663A | 0.736C | 0.774A |
|                   | Pixi               | 454A | 327A | 750A  | 374C | 902374A  | 637291A | 868579A  | 715856A | 0.800A | 0.718A | 0.784A | 0.774A |
|                   | Stowell            | 412A | 268A | 700A  | 488B | 755865A  | 518845A | 861369A  | 763179A | 0.797A | 0.732A | 0.753B | 0.773A |

|        |                                |                 |                 |                 |                   |                 |                 |                 |                                    |                 |                 |                 |
|--------|--------------------------------|-----------------|-----------------|-----------------|-------------------|-----------------|-----------------|-----------------|------------------------------------|-----------------|-----------------|-----------------|
|        | F <sub>0</sub> /F <sub>M</sub> |                 |                 |                 | RC <sub>ABS</sub> |                 |                 |                 | (1-V <sub>j</sub> )/V <sub>j</sub> |                 |                 |                 |
|        | Spring                         |                 | Autumn          |                 | Spring            |                 | Autumn          |                 | Spring                             |                 | Autumn          |                 |
| weeks: | 1 <sup>st</sup>                | 5 <sup>th</sup> | 1 <sup>st</sup> | 5 <sup>th</sup> | 1 <sup>st</sup>   | 5 <sup>th</sup> | 1 <sup>st</sup> | 5 <sup>th</sup> | 1 <sup>st</sup>                    | 5 <sup>th</sup> | 1 <sup>st</sup> | 5 <sup>th</sup> |

Perennial ryegrass

| (A: Treatment)  |        |        |        |        |        |        |        |        |        |        |        |        |  |
|-----------------|--------|--------|--------|--------|--------|--------|--------|--------|--------|--------|--------|--------|--|
| Control         | 0.774B | 1.814C | 3.017B | 2.853C | 1.301B | 0.675B | 1.212B | 1.066C | 0.654C | 0.569A | 0.656C | 0.644C |  |
| TE [1.5g/100m²] | 0.811  |        |        |        |        |        |        |        |        |        |        |        |  |
|                 | A      | 1.933B | 4.046A | 3.108B | 1.731A | 0.736B | 1.711A | 1.241B | 0.667B | 0.594A | 0.674B | 0.655B |  |
| TE [4.5g/100m²] | 0.806  |        |        |        |        |        |        |        |        |        |        |        |  |
|                 | A      | 2.081A | 3.311B | 3.843A | 1.851A | 0.834A | 1.586A | 1.516A | 0.685A | 0.601A | 0.701A | 0.665A |  |
| (B: Varieties)  |        |        |        |        |        |        |        |        |        |        |        |        |  |
| Goalkeeper      | 0.798  |        |        |        |        |        |        |        |        |        |        |        |  |
|                 | A      | 2.023A | 3.479A | 3.105A | 1,623A | 0.780A | 1.564A | 1.206A | 0.672A | 0.601A | 0.694A | 0.636A |  |
| Jackento        | 0.800  |        |        |        |        |        |        |        |        |        |        |        |  |
|                 | A      | 1.808A | 3.136A | 3.346A | 1.597A | 0.732A | 1.471A | 1.274A | 0.662A | 0.581B | 0.672A | 0.627A |  |
| Top Gun         | 0.792  |        |        |        |        |        |        |        |        |        |        |        |  |
|                 | A      | 1.997A | 3.757A | 3.352A | 1.652A | 0.733A | 1.324A | 1.342A | 0.671A | 0.581B | 0.674A | 0.633A |  |

Kentucky bluegrass

| (A: Treatment) |        |         |        |        |        |         |        |        |        |        |        |        |  |
|----------------|--------|---------|--------|--------|--------|---------|--------|--------|--------|--------|--------|--------|--|
| Control        | 3.181B | 2.250A  | 3.546A | 3.535A | 1.279C | 0.913B  | 1.415A | ####C  | 0.662C | 0.617B | 0.612B | 0.668B |  |
| TE             | 4.208  |         |        |        |        |         |        |        |        |        |        |        |  |
| [1.5g/100m²]   | A      | 2.570A  | 3.659A | 3.560A | 1.893B | 1.108A  | 1.386A | 1.800A | 0.677B | 0.646A | 0.578C | 0.706A |  |
| TE             | 4.095  |         |        |        |        |         |        |        |        |        |        |        |  |
| [4.5g/100m²]   | A      | 2.310A  | 3.150B | 3.290A | 2.056A | 1.080A  | 1.592A | 1.701B | 0.701A | 0.644A | 0.644A | 0.699A |  |
| (B: Varieties) |        |         |        |        |        |         |        |        |        |        |        |        |  |
| Award          | 3.947  |         |        |        |        |         |        |        |        |        |        |        |  |
|                | A      | 2.420AB | 3.615A | 3.471A | 1.747A | 1.067AB | 1.479A | 1.616B | 0.677A | 0.645A | 0.618A | 0.679A |  |
| Bluchip        | 3.831  |         |        |        |        |         |        |        |        |        |        |        |  |
|                | A      | 2.540A  | 3.270B | 3.620A | 1.743A | 1.120A  | 1.428A | 1.905A | 0.675A | 0.644A | 0.611A | 0.712A |  |
| Liberator      | 3.706  |         |        |        |        |         |        |        |        |        |        |        |  |
|                | A      | 2.170B  | 3.469A | 3.295A | 1.738A | 0.914B  | 1.488A | 1.489B | 0.688A | 0.617B | 0.606A | 0.683A |  |

Tall fescue

|                   |        |        |        |        |        |        |        |        |        |        |        |        |  |
|-------------------|--------|--------|--------|--------|--------|--------|--------|--------|--------|--------|--------|--------|--|
| (A:<br>Treatment) |        |        |        |        |        |        |        |        |        |        |        |        |  |
| Control           | 3.388B | 2.321A | 3.190A | 3.862A | 1.651B | 0.991A | 1.462A | 1.987A | 0.719A | 0.644A | 0.639A | 0.707B |  |
| TE                | 4.580  |        |        |        |        |        |        |        |        |        |        |        |  |
| [1.5g/100m²]      | A      | 2.759A | 3.166A | 3.821A | 2.191A | 1.079A | 1.691A | 2.056A | 0.714A | 0.634A | 0.678A | 0.691C |  |
| TE                | 4.453  |        |        |        |        |        |        |        |        |        |        |        |  |
| [4.5g/100m²]      | A      | 2.579A | 3.575A | 2.922B | 2.179A | 1.223A | 1.642A | 1.635B | 0.708A | 0.635A | 0.642B | 0.729A |  |
| (B: Varieties)    |        |        |        |        |        |        |        |        |        |        |        |        |  |
| Arid 3            | 4.075  |        |        |        |        |        |        |        |        |        |        |        |  |
|                   | A      | 2.043B | 2.874C | 3.618A | 1.952B | 0.964A | 1.289B | 2.069A | 0.708B | 0.641A | 0.625A | 0.728A |  |

|                    |                              |                              |                 |        |                 |        |        |                 |        |        |                 |        |  |
|--------------------|------------------------------|------------------------------|-----------------|--------|-----------------|--------|--------|-----------------|--------|--------|-----------------|--------|--|
|                    | Pixi                         | 4.080                        |                 |        |                 |        |        |                 |        |        |                 |        |  |
|                    | A                            | 2.789A                       | 3.640A          | 3.488A | 2.071A          | 1.208A | 1.800A | 1.795B          | 0.721A | 0.638A | 0.662A          | 0.703B |  |
|                    | Stowell                      | 4.000                        |                 |        |                 |        |        |                 |        |        |                 |        |  |
|                    | A                            | 2.828A                       | 3.073B          | 3.499A | 1.998AB         | 1.120A | 1.674A | 1.813B          | 0.712A | 0.633A | 0.672A          | 0.696B |  |
| PIABs              |                              |                              |                 |        |                 |        |        |                 |        |        |                 |        |  |
|                    |                              |                              |                 |        | Spring          |        |        |                 |        |        | Autumn          |        |  |
| weeks:             |                              |                              | 1 <sup>st</sup> |        | 5 <sup>th</sup> |        |        | 1 <sup>st</sup> |        |        | 5 <sup>th</sup> |        |  |
| Perennial ryegrass |                              |                              |                 |        |                 |        |        |                 |        |        |                 |        |  |
| (A: Treatment)     |                              |                              |                 |        |                 |        |        |                 |        |        |                 |        |  |
|                    | Control                      |                              |                 | 2.782B |                 | 0.759B |        | 1.587C          |        |        | 2.782B          |        |  |
|                    | TE [1.5g/100m <sup>2</sup> ] |                              |                 | 3.862A |                 | 0.916B |        | 2.073A          |        |        | 3.862A          |        |  |
|                    | TE [4.5g/100m <sup>2</sup> ] |                              |                 | 3.801A |                 | 1.176A |        | 2.238B          |        |        | 3.801A          |        |  |
| (B: Varieties)     |                              |                              |                 |        |                 |        |        |                 |        |        |                 |        |  |
|                    |                              | Goalkeeper                   |                 | 3.013A |                 | 1.051A |        | 1.356A          |        |        | 3.013A          |        |  |
|                    |                              | Jackento                     |                 | 2.738A |                 | 0.874A |        | 2.431A          |        |        | 2.738B          |        |  |
|                    |                              | Top Gun                      |                 | 3.065A |                 | 0.927A |        | 2.108A          |        |        | 3.065A          |        |  |
| Kentucky bluegrass |                              |                              |                 |        |                 |        |        |                 |        |        |                 |        |  |
| (A: Treatment)     |                              |                              |                 |        |                 |        |        |                 |        |        |                 |        |  |
|                    | Control                      |                              |                 | 2.767B |                 | 1.437C |        | 3.162A          |        |        | 3.702C          |        |  |
|                    | TE [1.5g/100m <sup>2</sup> ] |                              |                 | 5.470A |                 | 1.996A |        | 3.009A          |        |        | 4.649A          |        |  |
|                    | TE [4.5g/100m <sup>2</sup> ] |                              |                 | 5.936A |                 | 1.788B |        | 3.425A          |        |        | 4.120B          |        |  |
| (B: Varieties)     |                              |                              |                 |        |                 |        |        |                 |        |        |                 |        |  |
|                    |                              | Award                        |                 | 4.931A |                 | 1.834A |        | 3.386A          |        |        | 3.955B          |        |  |
|                    |                              | Bluchip                      |                 | 4.643A |                 | 2.011A |        | 2.999C          |        |        | 4.956A          |        |  |
|                    |                              | Liberator                    |                 | 4.599A |                 | 1.371B |        | 3.211B          |        |        | 3.559B          |        |  |
| Tall fescue        |                              |                              |                 |        |                 |        |        |                 |        |        |                 |        |  |
| (A: Treatment)     |                              |                              |                 |        |                 |        |        |                 |        |        |                 |        |  |
|                    |                              | Control                      |                 | 4.039B |                 | 1.587A |        | 2.948A          |        |        | 5.570A          |        |  |
|                    |                              |                              |                 | 6.796A |                 | 2.073A |        | 3.700A          |        |        | 5.480A          |        |  |
|                    |                              | TE [4.5g/100m <sup>2</sup> ] |                 | 6.916A |                 | 2.238A |        | 3.664A          |        |        | 3.580B          |        |  |
| (B: Varieties)     |                              |                              |                 |        |                 |        |        |                 |        |        |                 |        |  |
|                    |                              | Arid 3                       |                 | 5.724B |                 | 1.356B |        | 2.389C          |        |        | 5.637A          |        |  |
|                    |                              | Pixi                         |                 | 6.235A |                 | 2.431A |        | 4.420B          |        |        | 4.427B          |        |  |
|                    |                              | Stowell                      |                 | 5.791A |                 | 2.108A |        | 3.501A          |        |        | 4.580B          |        |  |

**Table S4. a.** Eigenvector values of principal components calculated for a complete dataset. **b.** The loading weights of each dataset variable on each principal component.



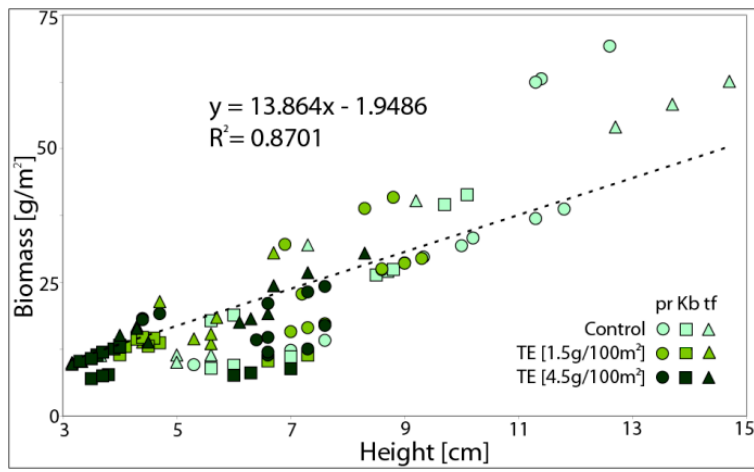

**Figure S1.** The correlation between grass height [cm] and clipped biomass [g/m<sup>2</sup>]. Circles mark varieties of perennial ryegrass (pr), squares- Kentucky bluegrass (Kb), and triangles- tall fescue (tf).
